# Supplementary material
Source: PubMed Central journal article supplement (PMC3026414)

**ey>nuGFP** *ap-lacZ* **Dll**  
**DE-Cad**

*ap-lacZ* **Dll** **DE-Cad**

**Dll** **DE-Cad**

L3

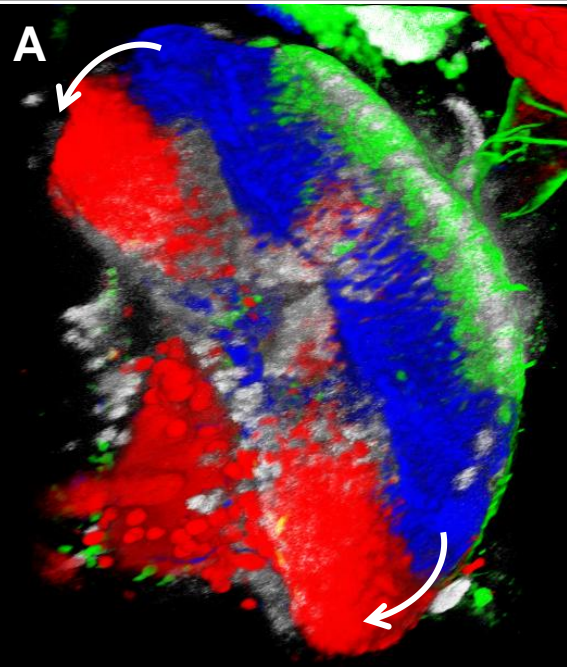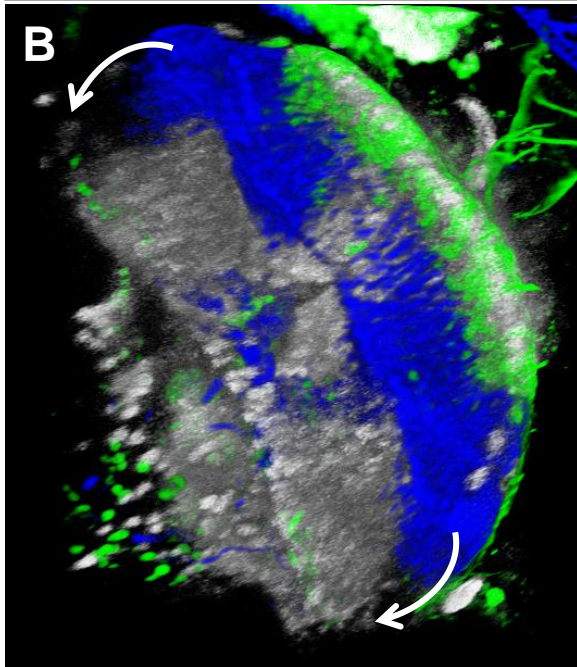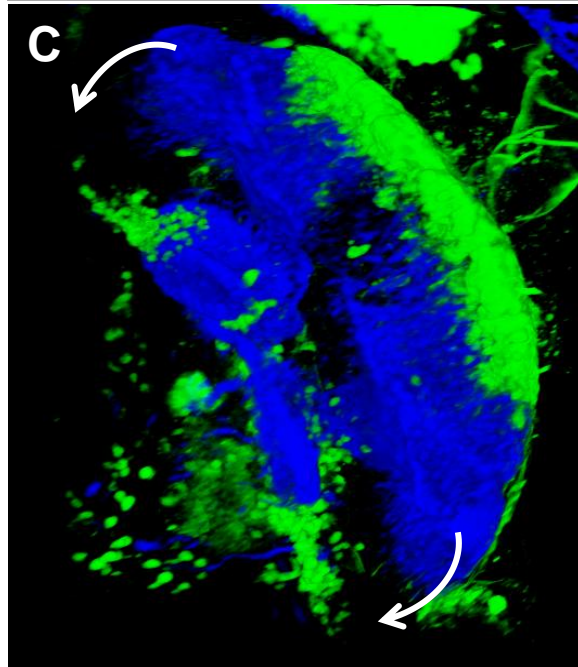

Supplement: supp_dev.056069_DEV056069figS1.pdf [file supp_dev.056069_DEV056069figS1.pdf]

*ey>nuGFP Dll ap-lacZ*

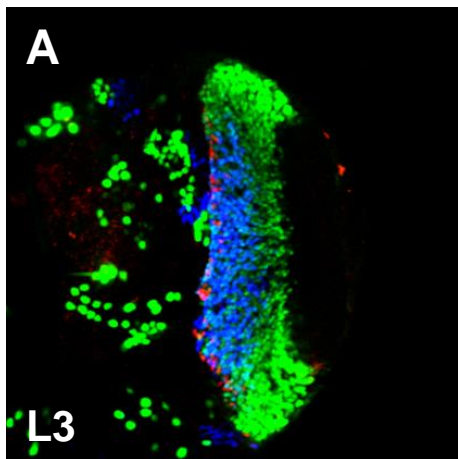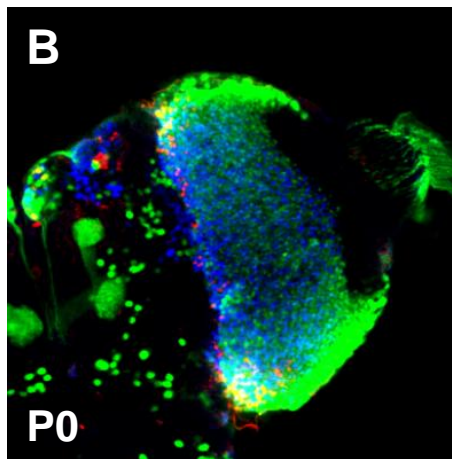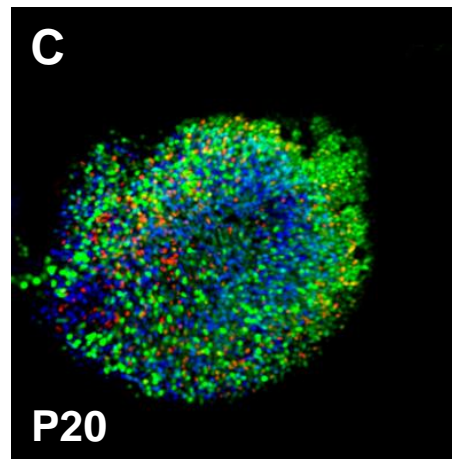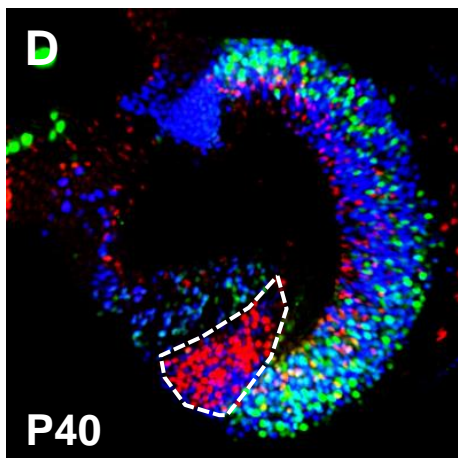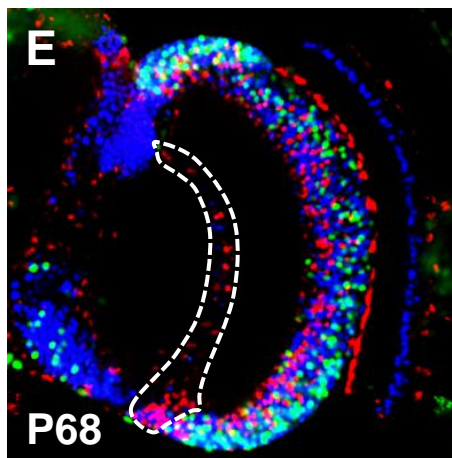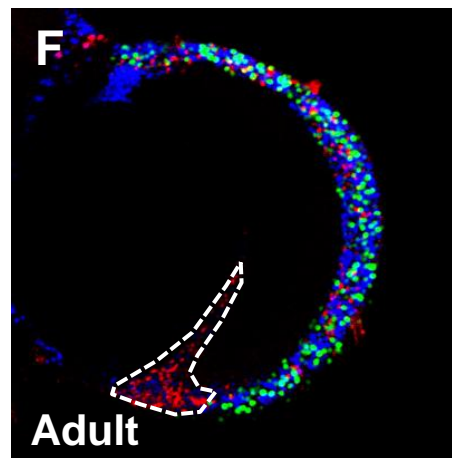

Supplement: supp_dev.056069_DEV056069figS2.pdf [file supp_dev.056069_DEV056069figS2.pdf]

*ap*>CD8-GFP Mira DE-Cad DAPI

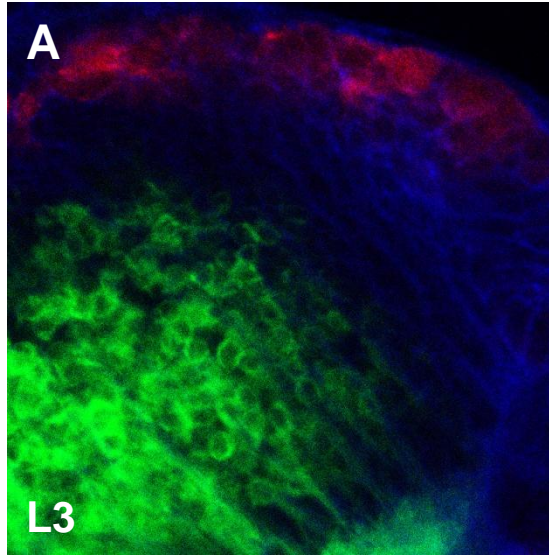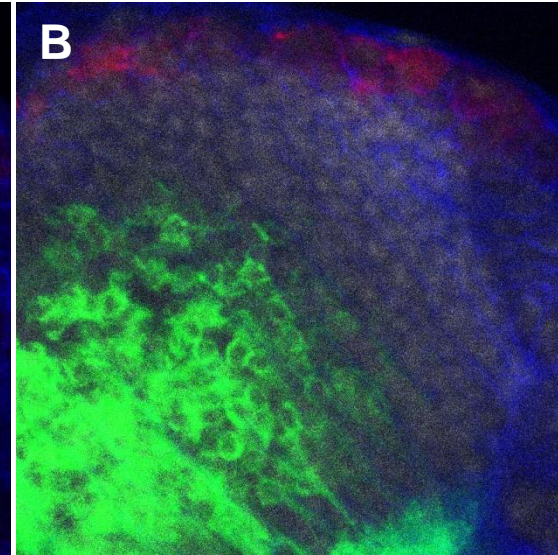

*dll*>CD8-GFP Mira DE-Cad DAPI

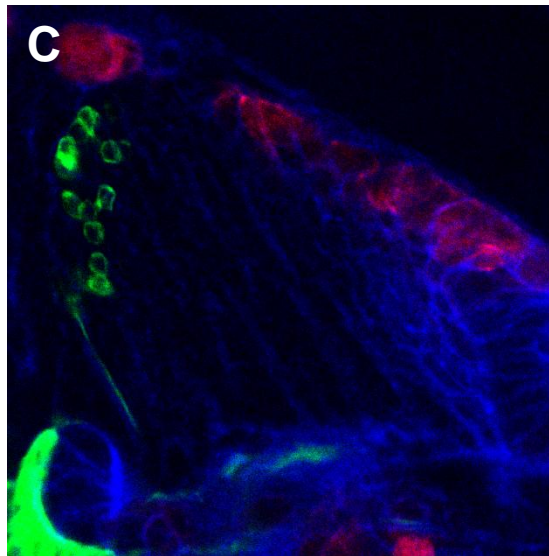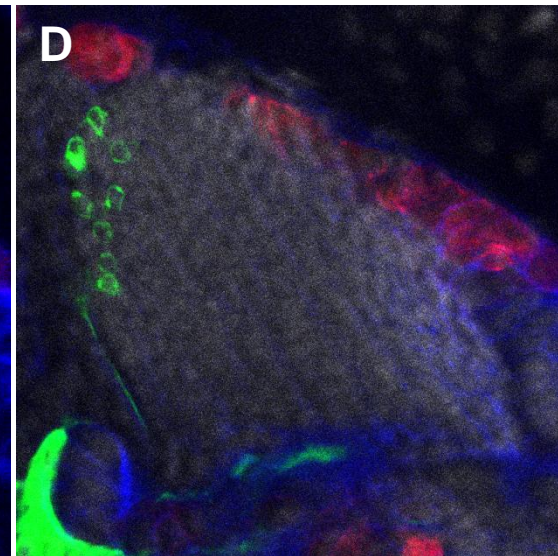

Supplement: supp_dev.056069_DEV056069figS3.pdf [file supp_dev.056069_DEV056069figS3.pdf]
